# Supplementary material for: A Rab5 GTPase module is important for autophagosome closure
Source: PubMed Central journal article supplement (PMC5626503; doi:10.1371/journal.pgen.1007020), 2017-09-21

# Figure S7

A.

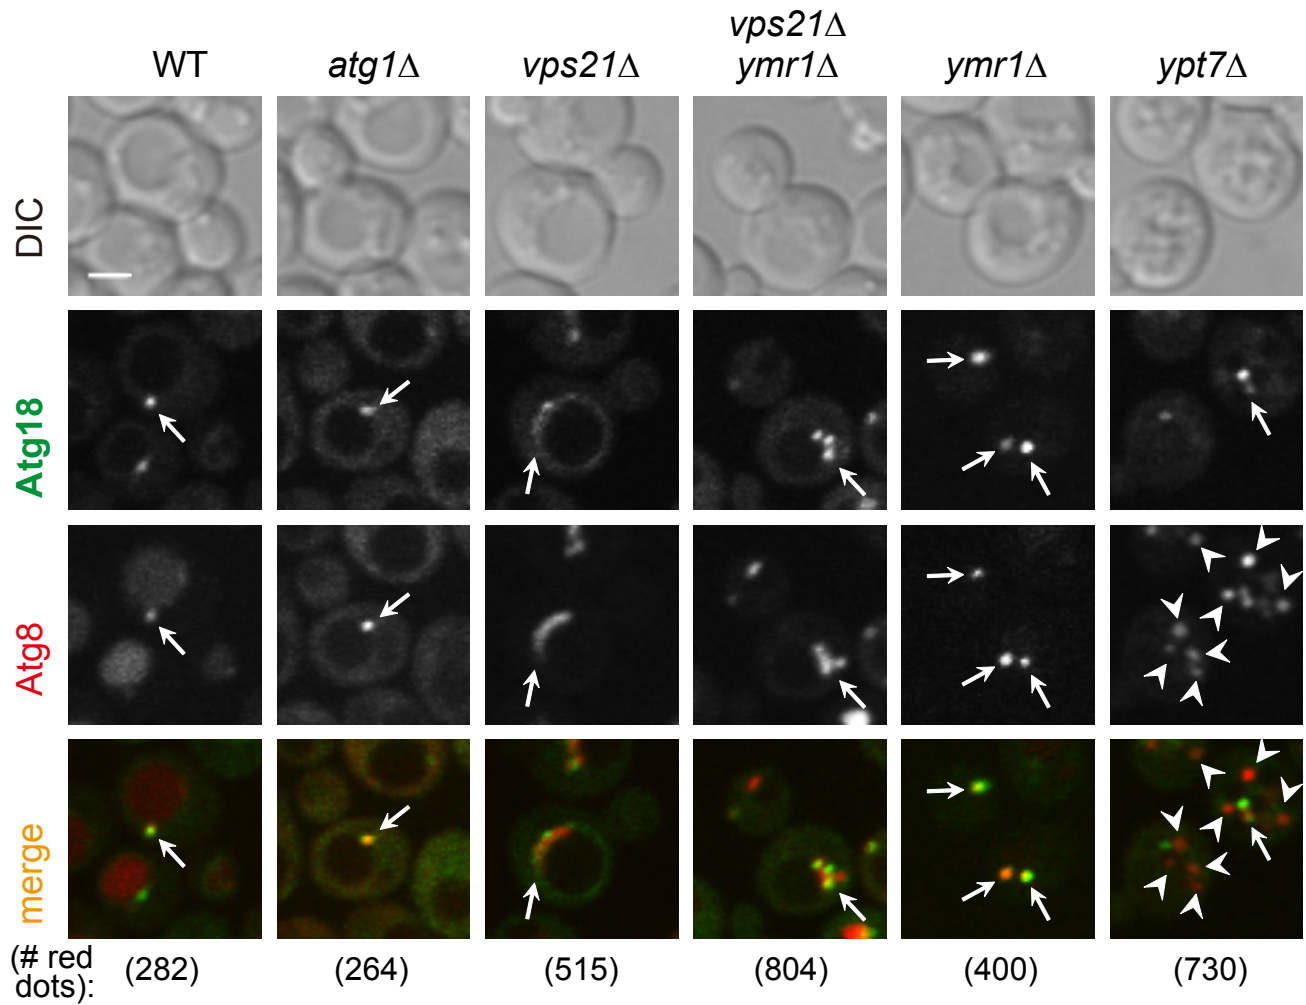

B.

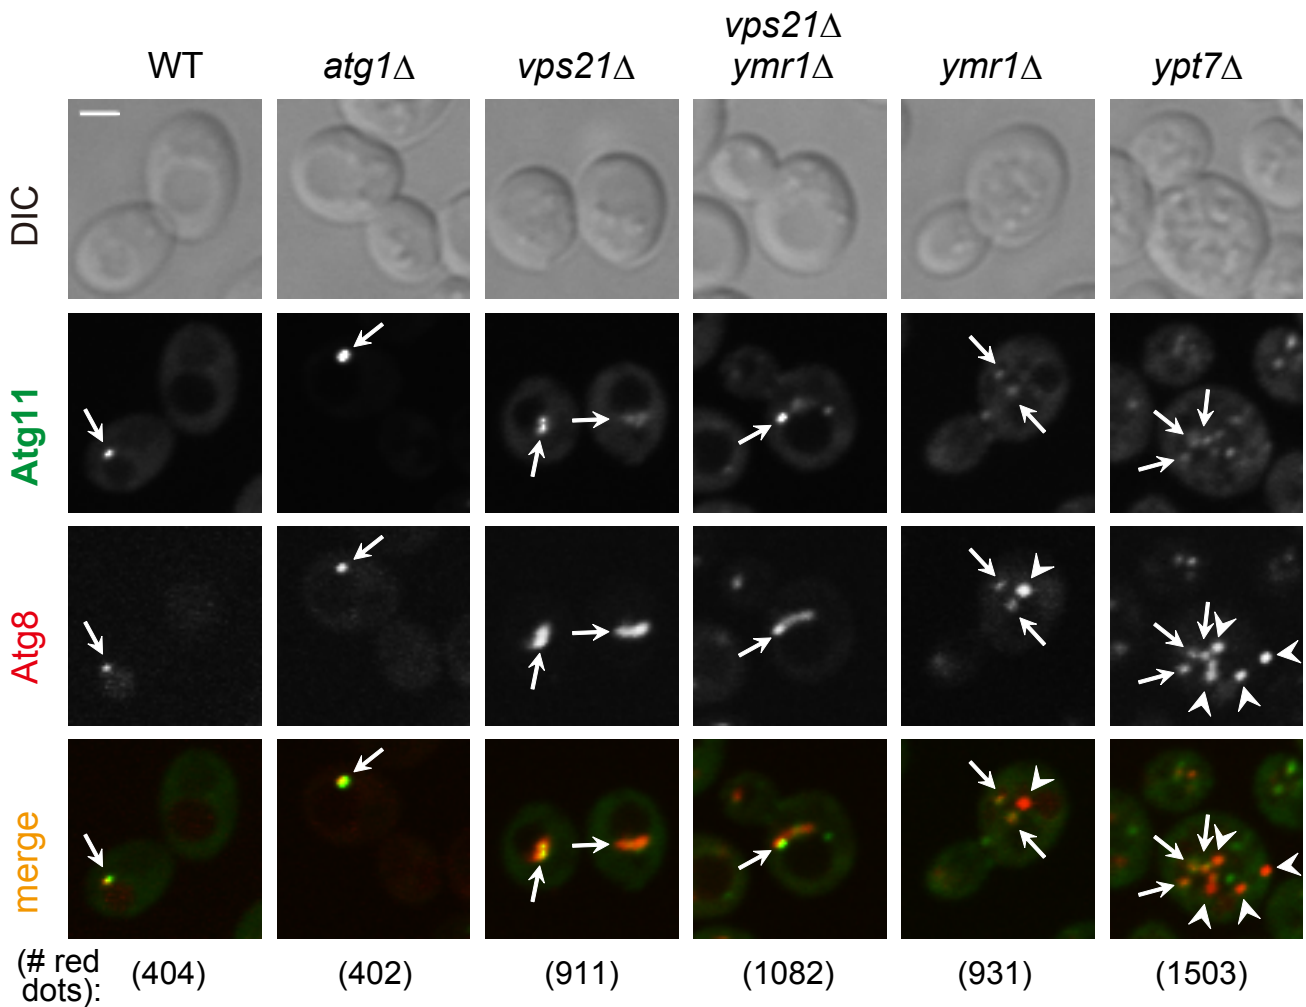

Supplement: pgen.1007020.s008.pdf [file pgen.1007020.s008.pdf]
